# Supplementary material for: Mother–infant interaction quality and sense of parenting competence at six months postpartum for first-time mothers in Taiwan: a multiple time series design
Source: Springer Nature journal article supplement (doi:10.1186/s12884-018-1979-7), 2018-09-06
Supplement: MOESM1 [file 16103490]

## Questionnaire A

1. Name: \_\_\_\_\_

Phone numbers: \_\_\_\_\_

Address of first time visited: \_\_\_\_\_

2. Mother's age (m/y): \_\_\_\_\_

Education:  (1) Junior high school or below  (2) Senior high school

(3) College or above

Religion :  (1) None  (2) Buddhism  (3) I-Kuan Tao  (4) Taoism

(5) Islam  (6) Christian  (7) Catholicism  (8) Other: \_\_\_\_\_

Work status:  (1) Housewife  (2) Part-time Job  (3) Full-time job

Occupation: \_\_\_\_\_

3. Father's age (m/y): \_\_\_\_\_

Education:  (1) Junior high school or below  (2) Senior high school

(3) College or above

Religion :  (1) None  (2) Buddhism  (3) I-Kuan Tao  (4) Taoism

(5) Islam  (6) Christian  (7) Catholicism  (8) Other: \_\_\_\_\_

Work status:  (1) Unemployment  (2) Part-time Job  (3) Full-time job

Occupation: \_\_\_\_\_

4. Pregnancy planned?  (1) None  (2) Yes

5. Obtained information on raising children during pregnancy?

(1) None

(2) Yes, from?  (a) Relatives or friends  (b) Books and magazines

(c) Health care personnel  (d) Internet  (e) Other: \_\_\_\_\_

6. Smoking habit?  (1) None  (2) Yes, \_\_\_\_\_ cigarettes per day for \_\_\_\_\_ years

(3) Quit

7. Drinking habit?  (1) None  (2) Yes, \_\_\_\_\_ glasses (240 c.c.) per day for \_\_\_\_\_ years

(3) Quit

(\*Item 8-9, recorded by a researcher)

8. Gravida \_\_\_\_\_ Term \_\_\_\_\_ Pre-term \_\_\_\_\_ Abortion \_\_\_\_\_ Living \_\_\_\_\_

BW (before pregnancy): \_\_\_\_\_ Kg; BW (before labor): \_\_\_\_\_ Kg;

Weight gain: \_\_\_\_\_ Kg

GA \_\_\_\_\_ wk

Delivery:  (1) NSD ;  (2) C/S

Baby feeding:  (1) Breastfeeding  (2) Bottle-feeding

9. Newborn Birth Time: \_\_\_\_\_ y \_\_\_\_\_ m \_\_\_\_\_ d, \_\_\_\_\_ :

Gender:  (1) Boy  (2) Girl

Birth weight: \_\_\_\_\_ gm; Apgar Score: \_\_\_\_\_ → \_\_\_\_\_
