# Supplementary material for: Mother–infant interaction quality and sense of parenting competence at six months postpartum for first-time mothers in Taiwan: a multiple time series design
Source: BMC Pregnancy Childbirth. 2018 Sep 6;18:365. doi: 10.1186/s12884-018-1979-7 (PMC6127995; doi:10.1186/s12884-018-1979-7)
Supplement: Supplementary file 2 — Questionnaires B. breastfeeding and baby care practices. (PDF 280 kb) [file 12884_2018_1979_MOESM2_ESM.pdf]

## Questionnaire B

1. Visited Place: ☐ (1) Postpartum nursing centers      ☐ (2) Home
2. Baby average wake time per day: \_\_\_\_\_ hr/day
3. Baby primary caregiver: ☐ (1) Mother    ☐ (2) Father    ☐ (3) Family    ☐ (4) Others
4. Mother care baby pattern: ☐ (1) Day and night, 24hrs.    ☐ (2) After work  
☐ (3) Weekend Only      ☐ (4) Others: \_\_\_\_\_
5. Mother spent to care for and handle with their babies in a week? \_\_\_\_\_ hr/wk
6. Baby feeding: ☐ (1) Exclusive Breastfeeding    ☐ (2) Exclusive Bottle-feeding  
☐ (3) Mixed      ☐ (4) start eating Non-staple food  
☐ (5) Others: \_\_\_\_\_
7. Mother perceived resting frequency: ☐ (1) Often    ☐ (2) Sometimes    ☐ (3) Seldom
